# Supplementary material
Source: PubMed Central journal article supplement (PMC4719457)
Supplement: JB.00338-15_zjb999093877so1.pdf [file JB.00338-15_zjb999093877so1.pdf]

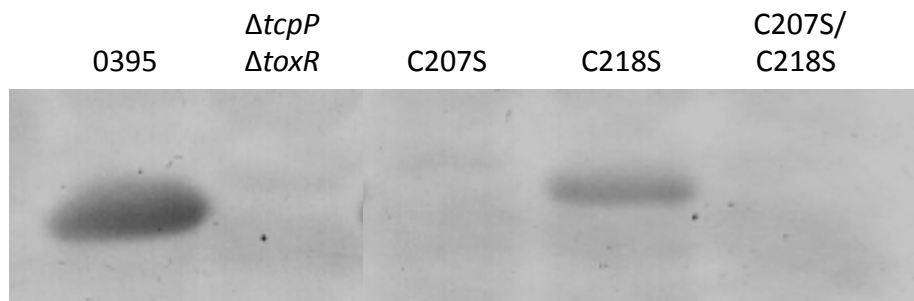

**Figure S1.** TcpP expression in strains assessed for CT production. Western blot analysis of TcpP expression from 0395, EK459 ( $\Delta tcpP \Delta toxR$ ) and chromosomally-encoded TcpP mutants.

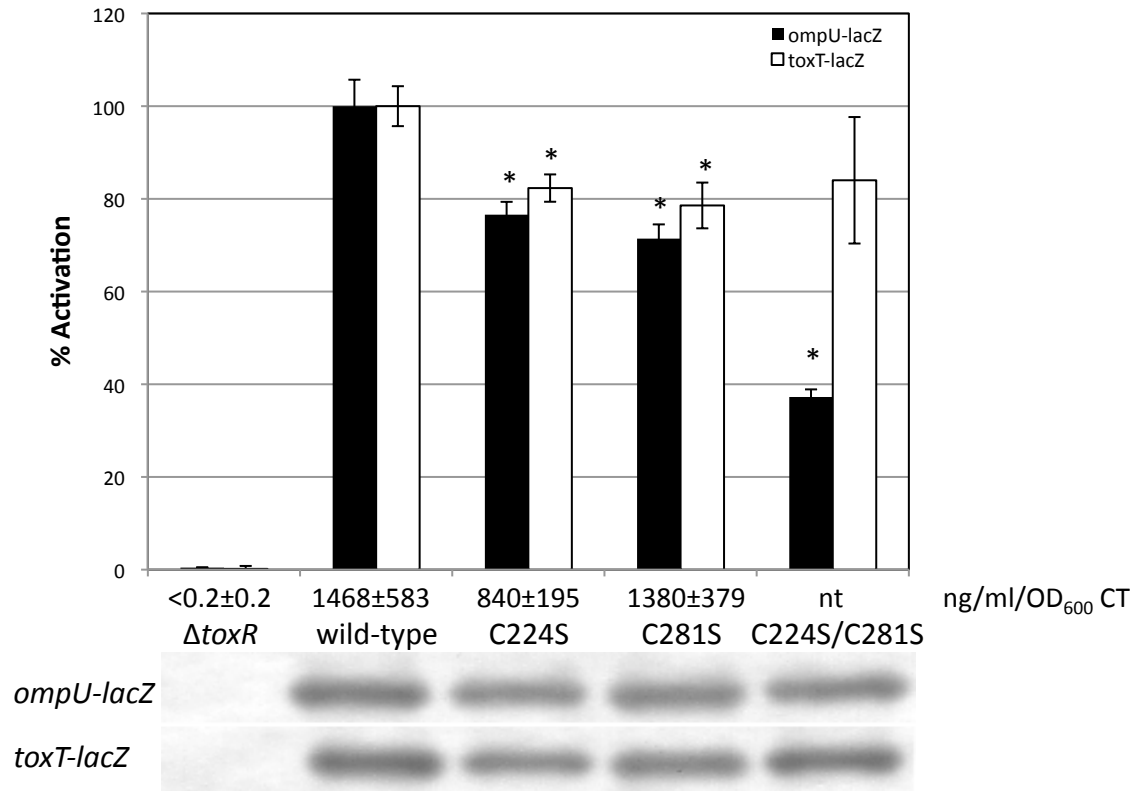

**Figure S2:** Chromosomally-encoded ToxR periplasmic mutants have modest effects on *ompU* expression and minimal effects on *toxT* expression and CT production. Chromosomally expressed ToxR periplasmic cysteine mutants were assessed for transcription activation of *toxT-lacZ* and *ompU-lacZ* using chromosomal reporters \* $p < 0.005$  relative to wild-type ToxR. The ng/ml/OD<sub>600</sub> of cholera toxin produced by each strain is designated under the graph as measured by a CT-ELISA assay. No significant difference between CT production of wild-type ToxR and ToxR-C224S or ToxR-C281S was observed. Western blots using anti-ToxR antibody are shown below the graph to indicate stability of these mutants. nt=not tested. Transcription activation was tested at least twice in triplicate (n=6) for each strain. CT assays were performed twice in duplicate (n=4).

**Table S1.** List of strains and plasmids from this study.

| Strains            | Genotype/Characteristics                                                                                                                                                                                                                     | Source                |
|--------------------|----------------------------------------------------------------------------------------------------------------------------------------------------------------------------------------------------------------------------------------------|-----------------------|
| <i>E. coli</i>     |                                                                                                                                                                                                                                              |                       |
| DH5α               | <i>supE44 ΔlacU169(F80lacZDM15) hsdR17 recA1 endA1 gyrA96 thi-1 relA1</i>                                                                                                                                                                    | Laboratory collection |
| DH5α λpir          | <i>supE44 ΔlacU169(F80lacZDM15) hsdR17 recA1 endA1 gyrA96 thi-1 relA1 (λpir)</i>                                                                                                                                                             | Laboratory collection |
| SM10 λpir          | <i>thi-1 thr leu tonA lacY supE recA::RP4-2-Tc::Mu Km<sup>R</sup> (λpir)</i>                                                                                                                                                                 | Laboratory collection |
| EK3034             | Rosetta (DE3) pLysS: F <sup>-</sup> <i>ompT hsdS<sub>B</sub></i> (R <sub>B</sub> <sup>-</sup> m <sub>B</sub> <sup>-</sup> ) <i>gal dcm λ</i> (DE3 [ <i>lacI lacUV5-T7 gene1 ind1 sam7 nin5</i> ]) + pLysSRARE + pET30b+ <i>toxR</i> cyt2-TEV | this study            |
| <i>V. cholerae</i> |                                                                                                                                                                                                                                              |                       |
| O395               | 0395, wild-type Classical biotype                                                                                                                                                                                                            | Laboratory collection |
| RY1                | 0395 <i>ΔtcpP</i>                                                                                                                                                                                                                            | (1)                   |
| EK459              | 0395 <i>ΔtoxRΔtcpP</i>                                                                                                                                                                                                                       | (2)                   |
| EK307              | 0395 <i>ΔtoxR</i>                                                                                                                                                                                                                            | (2)                   |
| EK813              | 0395 <i>ΔtcpP toxT-lacZ</i>                                                                                                                                                                                                                  | (3)                   |
| EK1490             | 0395 <i>ΔtcpP ΔtoxR toxT-lacZ</i>                                                                                                                                                                                                            | (3)                   |
| SM269              | 0395 <i>tcpP</i> -C207S                                                                                                                                                                                                                      | this study            |
| SM492              | 0395 <i>tcpP</i> -C218S                                                                                                                                                                                                                      | this study            |
| SM495              | 0395 <i>tcpP</i> -C207S/C218S                                                                                                                                                                                                                | this study            |
| JM84               | 0395 <i>ΔyaeL</i>                                                                                                                                                                                                                            | (4)                   |
| JM128              | 0395 <i>ΔdegS</i>                                                                                                                                                                                                                            | (4)                   |
| NB43               | 0395 <i>Δptd</i>                                                                                                                                                                                                                             | (5)                   |
| JM160              | 0395 <i>ΔtcpP ΔyaeL</i>                                                                                                                                                                                                                      | this study            |
| SM1651             | 0395 <i>ΔtcpP ΔdegS</i>                                                                                                                                                                                                                      | this study            |
| SM1664             | 0395 <i>ΔtcpP Δptd</i>                                                                                                                                                                                                                       | this study            |
| SM1833             | 0395 <i>ΔtcpP ΔdegS Δptd</i>                                                                                                                                                                                                                 | this study            |
| EK3434             | 0395 <i>ΔtcpP Δtsp</i>                                                                                                                                                                                                                       | this study            |
| EK3428             | 0395 <i>ΔtcpP Δtsp ΔdegS Δptd</i>                                                                                                                                                                                                            | this study            |
| EK410              | 0395 <i>ΔtoxR ompU-lacZ</i>                                                                                                                                                                                                                  | (6)                   |
| EK383              | 0395 <i>ompU-lacZ</i>                                                                                                                                                                                                                        | (6)                   |
| SM1301             | 0395 <i>ompU-lacZ toxR</i> -C224S                                                                                                                                                                                                            | this study            |
| SM1264             | 0395 <i>ompU-lacZ toxR</i> -C281S                                                                                                                                                                                                            | this study            |
| SM1303             | 0395 <i>ompU-lacZ toxR</i> -C224S/C281S                                                                                                                                                                                                      | this study            |
| EK733              | 0395 <i>toxT-lacZ</i>                                                                                                                                                                                                                        | (7)                   |
| EK1072             | 0395 <i>ΔtoxR toxT-lacZ</i>                                                                                                                                                                                                                  | (8)                   |
| SM1299             | 0395 <i>toxT-lacZ toxR</i> -C224S                                                                                                                                                                                                            | this study            |
| SM1260             | 0395 <i>toxT-lacZ toxR</i> -C281S                                                                                                                                                                                                            | this study            |
| SM1263             | 0395 <i>toxT-lacZ toxR</i> -C224S/C281S                                                                                                                                                                                                      | this study            |
| SM488              | 0395 <i>toxR</i> -C224S                                                                                                                                                                                                                      | this study            |

|                                                           |                         |               |
|-----------------------------------------------------------|-------------------------|---------------|
| SM486                                                     | 0395 <i>toxR</i> -C281S | this study    |
| <b>Plasmids</b>                                           |                         | <b>Source</b> |
| pEK41 (pMMB207- <i>tcpP</i> -HSV)                         |                         | (2)           |
| pMMB207                                                   |                         | (9)           |
| pMMB207- <i>tcpP</i> -HSV-C207S                           |                         | this study    |
| pMMB207- <i>tcpP</i> -HSV-C218S                           |                         | this study    |
| pMMB207- <i>tcpP</i> -HSV-C207S/C218S                     |                         | this study    |
| pSK- <i>toxR</i> -HA                                      |                         | (8)           |
| pACYC184 Tet <sup>S</sup>                                 |                         | (5)           |
| pACYC184- <i>tcpH</i>                                     |                         | (5)           |
| pTLI2 (pTL61T- <i>toxT</i> <sub>pro</sub> )               |                         | (10)          |
| pEK32 (pMMB207- <i>tcpPH</i> )                            |                         | (2)           |
| pBAD18 (Kan <sup>R</sup> )                                |                         | (11)          |
| pGOOD=pBAD18 (Kan <sup>R</sup> ) with modified polylinker |                         | this study    |
| pGOOD- <i>tcpP</i> (wt)                                   |                         | this study    |
| pGOOD- <i>tcpP</i> -C207S                                 |                         | this study    |
| pGOOD- <i>tcpP</i> -C218S                                 |                         | this study    |
| pGOOD- <i>tcpP</i> -C207S/C218S                           |                         | this study    |
| pGOOD- <i>tcpPH</i> (wt)                                  |                         | this study    |
| pGOOD- <i>tcpPH</i> -C207S                                |                         | this study    |
| pGOOD- <i>tcpPH</i> -C218S                                |                         | this study    |
| pGOOD- <i>tcpPH</i> -C207S/C218S                          |                         | this study    |
| pGOOD- <i>tcpP</i> (wt)- <i>H</i> -C114S                  |                         | this study    |
| pKAS32                                                    |                         | (12)          |
| pKAS32- <i>tcpP</i> -C207S                                |                         | this study    |
| pKAS32- <i>tcpP</i> -C218S                                |                         | this study    |
| pKAS32- <i>tcpP</i> -C207S/C218S                          |                         | this study    |
| pKAS32- $\Delta yaeL$                                     |                         | (4)           |
| pKAS32- $\Delta tcpP$                                     |                         | (2)           |
| pKAS32- $\Delta degS$                                     |                         | (4)           |
| pKAS32- $\Delta tsp$                                      |                         | (13)          |
| pET30b+ <i>toxR</i> cyt2-TEV                              |                         | this study    |

**Table S2.** List of primers used in this study.

|                             |                                                          |
|-----------------------------|----------------------------------------------------------|
| tcpP C207S top              | CTATTGATCAACATCAGTCTTCCGTGAATTATG                        |
| tcpP C207S bottom           | CATAATTCACGGAAGACTGATGTTGATCAATAG                        |
| tcpP C218S top              | CAGAAGACATTAGAATCCACAAAAAATGCCCC                         |
| tcpP C218S bottom           | GGGGCATTTTTTGTGGATTCTAATGTCTTCTG                         |
| tcpP C218S chrom top        | CAGAAGACATTAGAATCCACAAAAAATTAAAAGC                       |
| tcpP C218S chrom bottom     | GCTTTTAATTTTTTGTGGATTCTAATGTCTTCTG                       |
| tcpH C114S top              | CAACTCGGCAAAGGTTCTTTTCTCGCCTTCCC                         |
| tcpH C114S bottom           | GGGAAGGCGAGAAAAGAACCTTTGCCGAGTTG                         |
| toxR C224S top              | CGTCAATCGAACTGTCCGTAAAAAATACAATG                         |
| toxR C224S bottom           | CATTGTATTTTTTAACGGACAGTTCGATTGACG                        |
| toxR C281S top              | GATGCCATCAAAGTGTCTGAGCTCGAGTACCC                         |
| toxR C281S bottom           | GGGTACTCGAGCTCAGACACTTTGATGGCATC                         |
| toxR C281S chrom top        | GATGCCATCAAAGTGTCTGAGTAGGATCTTGC                         |
| toxR C281S chrom bottom     | GCAAGATCCTACTCAGACACTTTGATGGCATC                         |
| pBAD NoBAMH1 top            | GATTAGCGGATCGTACCTGACGCTTTTTATC                          |
| pBAD NoBamH1 bottom         | GATAAAAAGCGTCAGGTACGATCCGCTAATC                          |
| pBAD NoNhe1 top             | ACCCGTTTTTTTGGGCAAGCGAATTCGAGC                           |
| pBAD NoNhe1 bottom          | GCTCGAATTCGCTTGCCCAAAAAAACGGGT                           |
| TEV site for pET30b+ BOTTOM | CCAGATCTGGGTACCGAGAACCTGTACTTCCAGGGCG<br>CCATGGCGATATCGG |
| TEV site for pET30b+ BOTTOM | CCGATATCGCCATGGCGCCCTGGAAGTACAGGTTCTC<br>GGTACCCAGATCTGG |
| NdeI-ToxR orf-1 Forw        | GGAATTCCATATGAGTCATATTGGTACTAAATTC                       |
| KpnI-ToxR orf-170 Rev       | GGGGTACCTCGATTCCCAAGTTTGGAG                              |

## References:

1. **Yu RR, DiRita VJ.** 1999. Analysis of an autoregulatory loop controlling ToxT, cholera toxin, and toxin-coregulated pilus production in *Vibrio cholerae*. *J Bacteriol* **181**:2584-2592.
2. **Krukoni ES, Yu RR, Dirita VJ.** 2000. The *Vibrio cholerae* ToxR/TcpP/ToxT virulence cascade: distinct roles for two membrane-localized transcriptional activators on a single promoter. *Mol Microbiol* **38**:67-84.
3. **Krukoni ES, DiRita VJ.** 2003. DNA binding and ToxR responsiveness by the wing domain of TcpP, an activator of virulence gene expression in *Vibrio cholerae*. *Mol Cell* **12**:157-165.
4. **Matson JS, DiRita VJ.** 2005. Degradation of the membrane-localized virulence activator TcpP by the YaeL protease in *Vibrio cholerae*. *Proc Natl Acad Sci USA* **102**:16403-16408.
5. **Beck NA, Krukoni ES, DiRita VJ.** 2004. TcpH Influences Virulence Gene Expression in *Vibrio cholerae* by Inhibiting Degradation of the Transcription Activator TcpP. *J Bacteriol* **186**:8309-8316.
6. **Crawford JA, Krukoni ES, DiRita VJ.** 2003. Membrane localization of the ToxR winged-helix domain is required for TcpP-mediated virulence gene activation in *Vibrio cholerae*. *Mol Microbiol* **47**:1459-1473.
7. **Häse CC, Mekalanos JJ.** 1998. TcpP protein is a positive regulator of virulence gene expression in *Vibrio cholerae*. *Proc Natl Acad Sci USA* **95**:730-734.
8. **Morgan SJ, Felek S, Gadwal S, Koropatkin NM, Perry JW, Bryson AB, Krukoni ES.** 2011. The two faces of ToxR: activator of *ompU*, co-regulator of *toxT* in *Vibrio cholerae*. *Mol Microbiol* **81**:113-128.
9. **Morales VM, Backman A, Bagdasarian M.** 1991. A series of wide-host-range low-copy-number vectors that allow direct screening for recombinants. *Gene* **97**:39-47.
10. **Higgins DE, DiRita VJ.** 1994. Transcriptional control of *toxT*, a regulatory gene in the ToxR regulon of *Vibrio cholerae*. *Mol Microbiol* **14**:17-29.
11. **Guzman L, Belin D, Carson M, Beckwith J.** 1995. Tight regulation, modulation, and high-level expression by vectors containing the arabinose pBAD promoter. *J Bacteriol* **177**:4121-4130.
12. **Skorupski K, Taylor RK.** 1996. Broad-host-range positive selection vectors for allelic exchange. *Gene* **169**:47-52.
13. **Teoh WP, Matson JS, DiRita VJ.** 2015. Regulated intramembrane proteolysis of the virulence activator TcpP in *Vibrio cholerae* is initiated by the tail-specific protease (Tsp). *Mol Microbiol* **97**: 822-831.
